# Mining underutilized whole-genome sequencing projects to improve 16S rRNA databases

January 1, 2021

Ben Nolan<sup>1, 2</sup>, Florence Abram<sup>1</sup>, Fiona Brennan<sup>3</sup>, Ashleigh Holmes<sup>4</sup>, Vincent O’Flaherty<sup>2</sup>,  
Leighton Pritchard<sup>5, 6\*</sup>, and Nicholas R. Waters<sup>1, 3, 5\*</sup>

<sup>1</sup> Functional Environmental Microbiology, Microbiology, School of Natural Sciences, National University of Ireland, Galway, Ireland

<sup>2</sup> Microbial Ecology Laboratory, Microbiology, School of Natural Sciences, National University of Ireland, Galway, Ireland

<sup>3</sup> Soil and Environmental Microbiology, Environmental Research Centre, Teagasc, Johnstown Castle, Wexford, Ireland

<sup>4</sup> Cell and Molecular Sciences, James Hutton Institute, Invergowrie, Dundee DD2 5DA, Scotland

<sup>5</sup> Information and Computational Sciences, James Hutton Institute, Invergowrie, Dundee DD2 5DA, Scotland

<sup>6</sup> Strathclyde Institute of Pharmacy and Biomedical Sciences, University of Strathclyde, Glasgow, G1 1XQ, Scotland

\* Corresponding authors: [leighton.pritchard@strath.ac.uk](mailto:leighton.pritchard@strath.ac.uk) or [nick.waters@bioskryb.com](mailto:nick.waters@bioskryb.com)

## Abstract

Current approaches to interpreting 16S rDNA amplicon data are hampered by several factors. Among these are database inaccuracy or incompleteness, sequencing error, and biased DNA/RNA extraction. Existing 16S rRNA databases source the majority of sequences from deposited amplicon sequences, draft genomes, and complete genomes. Most of the draft genomes available are assembled from short reads. However, repeated ribosomal regions are notoriously difficult to assemble well from short reads, and as a consequence the short-read-assembled 16S rDNA region may be an amalgamation of different loci within the genome. This complicates high-resolution community analysis, as a draft genome’s 16S rDNA sequence may be a chimera of multiple loci; in such cases, the draft-derived sequences in a database may not represent a 16S rRNA sequence as it occurs in biology. We present Focus16, a pipeline for improving 16S rRNA databases by mining NCBI’s Sequence Read Archive for whole-genome sequencing runs that could be reassembled to yield additional 16S rRNA sequences. Using riboSeed (a genome assembly tool for correcting rDNA misassembly), Focus16 provides a way to augment 16S rRNA databases with high-quality re-assembled sequences. In this study, we augmented the widely-used SILVA 16S rRNA database with the novel sequences disclosed by Focus16 and re-processed amplicon sequences from several benchmarking datasets with DADA2. Using this augmented SILVA database increased the number of amplicon sequence variants that could be

32 assigned taxonomic annotations. Further, fine-scale classification was improved by revealing ambiguities. We  
33 observed, for example, that amplicon sequence variants (ASVs) may be assigned to a specific genus where  
34 Focus16-correction would indicate that the ASV is represented in two or more genera. Thus, we demonstrate  
35 that improvements can be made to taxonomic classification by incorporating these carefully re-assembled 16S  
36 rRNA sequences, and we invite the community to expand our work to augment existing 16S rRNA reference  
37 databases such as SILVA, GreenGenes, and RDP.

## 38 Introduction

39 The use of genetic markers for microbial classification has seen explosive growth over the past decade (Liu et  
40 al. 2012; Boers, Jansen, and Hays 2019). The 16S rRNA gene is the standard utilised in the assessment of  
41 prokaryotic community composition by amplicon sequencing (Fukuda et al. 2016). 16S rRNA has been used  
42 for community analysis in diverse environments such as the gut microbiota of cattle and pigs (Avila-Jaime,  
43 Kawas, and Garcia-Mazcorro 2018), soil (Santamaria, Parrado, and López 2018), marine environments (Dang  
44 and Lovell 2000), and the human gut (Jovel et al. 2016). The success of this method hinges on the presence of  
45 the 16S rRNA gene in all domains and its relatively slow rate of base substitution; thus the rDNA regions can be  
46 targeted with primers but the amplicon sequences exhibit enough diversity that organisms can be differentiated  
47 at the genus or species level (Woese and Fox 1977; Woo et al. 2008).

48 Microbial genomes have a range of 16S rRNA gene copy numbers (GCNs), from the many Mycobacteria with  
49 a single copy to *Photobacterium damsela* Phdp Wu-121 with 21 copies (Větrovský and Baldrian 2013; Stoddard  
50 et al. 2015; Acinas et al. 2004). There may be variability between each 16S rDNA copy within an organism (Sun  
51 et al. 2013); this can negatively impact 16S rRNA classification in two ways. First, in taxa with low variability,  
52 diversity estimates can be skewed by overestimating taxa with higher GCN and underestimating those with low  
53 GCN. A trivial example would be a community of two organisms – one with five rDNA copies, one with a single  
54 copy; an even sequencing of the community would show a one-to-five abundance ratio. Second, some organisms  
55 have sufficient sequence variability between copies that they may be assigned different taxonomic classifications;  
56 indeed, certain extremophiles have been reported to possess very high 16S rRNA copy heterogeneity, up to 9.3%  
57 sequence variation in some species (Sun et al. 2013); this is well beyond the 97% or 99% clustering thresholds  
58 commonly used for community analysis, and clearly beyond the zero-radius OTU boundary (Edgar 2018).

59 These intergenomic rDNA repeats complicate community analysis, but each instance of the 16S rRNA  
60 contains valuable information. An ideal community analysis framework would utilize a database incorporating  
61 this information to both correct for copy number variation between organisms in a community, and correctly  
62 relate 16S rRNA variants to each organism.

63 Amongst the most widely used 16S rRNA databases for bacteria and archaea are Greengenes (DeSantis et al.  
64 2006), SILVA (Quast et al. 2012), and the Ribosomal Database Project (RDP) (Cole et al. 2005). Each contains  
65 16S rRNA sequences derived from multiple major international nucleotide sequence databases, principally EMBL/  
66 DDBJ and Genbank. The databases differ in their approach to sequence classification. The RDP database uses

67 the RDP classifier to assign taxonomy to 16S rRNA sequences (Wang et al. 2007). SILVA and Greengenes  
68 inherit a sequence's taxonomic assignment from the source database (such as NCBI or EBI). SILVA provides a  
69 non-redundant database version in which no taxonomic classification contains sequences with greater than 99%  
70 pairwise identity (Quast et al. 2012). Although each database performs sequence quality checks, only Greengenes  
71 actively checks for chimeric sequence, which can negatively affect 16S taxonomic assignment (DeSantis et al.  
72 2006).

73 The National Centre for Biotechnology Information (NCBI) provides multiple databases, including the  
74 Sequence Read Archive (SRA) (Kodama, Shumway, and Leinonen 2011) for raw high-throughput sequencing  
75 data, and the Genome database as an umbrella for draft and complete genomes. Not all genome sequences  
76 in the NCBI Genome database have publicly available raw data in the SRA, and only 10% of genomes in the  
77 database are closed or complete (Waters et al. 2018). Tabulating the accession types of the SILVA 132 database  
78 shows that 9.5% of sequences come from draft genome assemblies; the vast majority (87%) are obtained as  
79 amplicon sequences (usually Sanger sequenced), and the remaining 2% come from complete genomes. While  
80 Sanger-sequenced amplicons are generally very accurate, a common weakness of draft assemblies from short-read  
81 sequencing is incorrect assembly of repeated rDNA regions of a genome, which may be collapsed/merged into  
82 a single rDNA. The resulting 16S rRNA sequence could in turn be incorporated into SILVA, GreenGenes, or  
83 RDP. This compromises the quality of 16S rRNA databases, and such sequences should be treated with caution.  
84 Genome assemblies from short reads are prone to errors in rDNA regions, as the length of the repeated region  
85 exceeds read lengths. PCR spanning the rDNA region, followed by Sanger sequencing, or the use of long-read  
86 technologies such as PacBio or Nanopore sequencing, can resolve these multiple copies but, as the majority of  
87 the data generated over the last two decades comes from short read sequences, fixing collapsed regions remains a  
88 valuable goal (Land et al. 2015; Wagner et al. 2016).

89 The correct re-assembly of multiple rDNA regions of draft genomes can be achieved using riboSeed, which  
90 uses a reference genome to help assemble the rDNA regions of a draft genome (Waters et al. 2018). riboSeed  
91 exploits the observation that the flanking regions of the rDNA region are highly conserved within a taxon  
92 yet variable between rDNA copies in the same genome, by using targeted subassembly to correctly place each  
93 re-assembled copy of multi-locus rDNA repeats. The knock-on effect of assembling multi-copy rDNA operons is  
94 acquiring highly-accurate 16S rRNA sequences, which can be incorporated into 16S rRNA databases.

95 Here, we present the results of using such an approach to augment existing 16S rRNA databases with  
96 newly-assembled sequences from the SRA data corresponding to pre-existing draft genomes. The additional  
97 sequences provide greater coverage of ASVs in publicly-available datasets, aiding efforts to understand microbial  
98 communities.

## 99 Methods

### 100 The Focus16 Pipeline

101 We developed Focus16: a pipeline to augment existing 16S rRNA databases by mining the SRA database  
102 for candidate whole-genome sequencing studies for re-assembly. Candidate SRAs are identified, downloaded,  
103 subjected to automated quality control, re-assembled with riboSeed to resolve the rDNA operons, given a  
104 taxonomic assignment with Kraken, and formatted for addition to existing databases. Kraken2 assigns taxonomy  
105 using exact matches to a lowest common ancestor for k-mers from the whole genome assembly, mitigating the  
106 risk of misclassification compared to using a 16S rRNA classifier alone.

107 The pipeline is shown as a flowchart (Figure 1). Details of third-party tools used in Focus16 can be found in  
108 the Supplementary Methods section “Third-party software.”

109 Given a genus or “Genus species” binomial, the pipeline progresses as follows:

- 110 1. Candidate reference genomes are either provided or are identified and downloaded from RefSeq by matching  
111 the provided organism name.
- 112 2. Barrnap (Seemann 2020) is used to screen these complete genomes by estimating the 16S rRNA count.  
113 Reference genomes with a single 16S rRNA are discarded. This catches two cases:
  - 114 a. An organism may only have a single 16S rRNA. In this case riboSeed assembly will not improve on  
115 existing draft genomes.
  - 116 b. A draft genome may have been incorrectly attributed the classification of “complete,” and present as  
117 having a single rRNA sequence when it in fact has more than one. Any such errant reference genomes  
118 are therefore discarded, and the remaining references are available for use in the pipeline.
- 119 3. A Mash (Ondov et al. 2016) sketch is generated from the references passing the filtering in step 2.
- 120 4. sraFind (<https://github.com/nickp60/sraFind>) is used to identify all whole-genome sequencing SRA  
121 accessions for the organism of interest; these are downloaded with fastq-dump or fasterq-dump (“Sra-Tools”  
122 2019). Steps 4a-4e are applied to each SRA.
  - 123 a. **Identify closest reference genome.** For a given SRA, the most compatible reference genome is  
124 determined via plentyofbugs (Waters 2019), which performs an initial assembly with the fast and  
125 highly-accurate assembler SKESA (Souvorov, Agarwala, and Lipman 2018) using a subsample of  
126 1M reads. Mash is used to identify the closest match between the preliminary assembly and all the  
127 reference genomes from step 1. If no close match above a user-defined threshold (defaulting to a Mash  
128 distance of 0.1, roughly corresponding to a within-genus match (Ondov et al. 2016)) is identified, the  
129 SRA is skipped; otherwise, the closest match is retained for use as a reference genome.

- 130        b. **Classify Assembly.** Kraken2 (Wood, Lu, and Langmead 2019) is used to assign taxonomic classifi-  
131            cation to the preliminary SKESA assembly. The highest-ranked binomial name is recorded, and the  
132            full Kraken2 report is stored in the output folder for inspection.
- 133        c. **Pre-Assembly Quality Control.** Reads are run through several quality control steps. The average  
134            length of the reads is checked; an SRA that contains reads of very low length (i.e. an average less than  
135            65bp) is rejected, as very short reads cannot be used effectively by riboSeed to differentiate rDNA  
136            flanking regions. Reads are then quality trimmed with Sickle (Joshi and Fass 2011) using default  
137            parameters. fastp (Chen et al. 2018) is used to identify and remove any remaining adapter sequences.  
138            For paired-end runs, unpaired reads are rejected.
- 139        d. **Downsample.** Read coverage is assessed using either a user-provided estimate of genome length  
140            or the length of the reference genome. If read coverage exceeds a user-specified threshold (defaults  
141            to 50x coverage, as further coverage can artificially support sequencing errors; see (Bankevich et al.  
142            2012)), trimmed reads are down-sampled to reach the desired coverage with seqtk (Li 2020).
- 143        e. **De fere novo Assembly.** The SRA reads (or downsampled reads from 4d) are then assembled using  
144            riboSeed, using the reference genome determined in (2a) as a template genome. Subassemblies are  
145            performed with SPAdes (Bankevich et al. 2012); the default parameters of 3 rounds of seeding and  
146            1kbp flanking regions are used.
- 147        5. 16S rDNA sequences are extracted and formatted.
- 148            a. Barrnap is run on either the subassemblies (“fast” mode) or the final assembly (“full” mode).
- 149            b. Taxonomy assigned by Kraken2 in step 4b is used to label extracted sequences.
- 150            c. Sequences are written to a fasta file that matches the format used by the SILVA database.

151        In our analysis, we filtered to retain only full-length sequences by removing any 16S rRNA under 1358bp  
152        (under the 1st quartile of the sequence lengths in SILVA). Additionally, we removed any 16S rRNA for which  
153        Kraken2’s report showed inconclusive domain-level taxonomic assignment: assemblies were excluded if a single  
154        domain was not assigned to over 70% of contigs. This was done to remove potentially-contaminated datasets  
155        (see Supplementary Methods section “Identifying poor taxonomic assignments,” Figures S4 and S5).

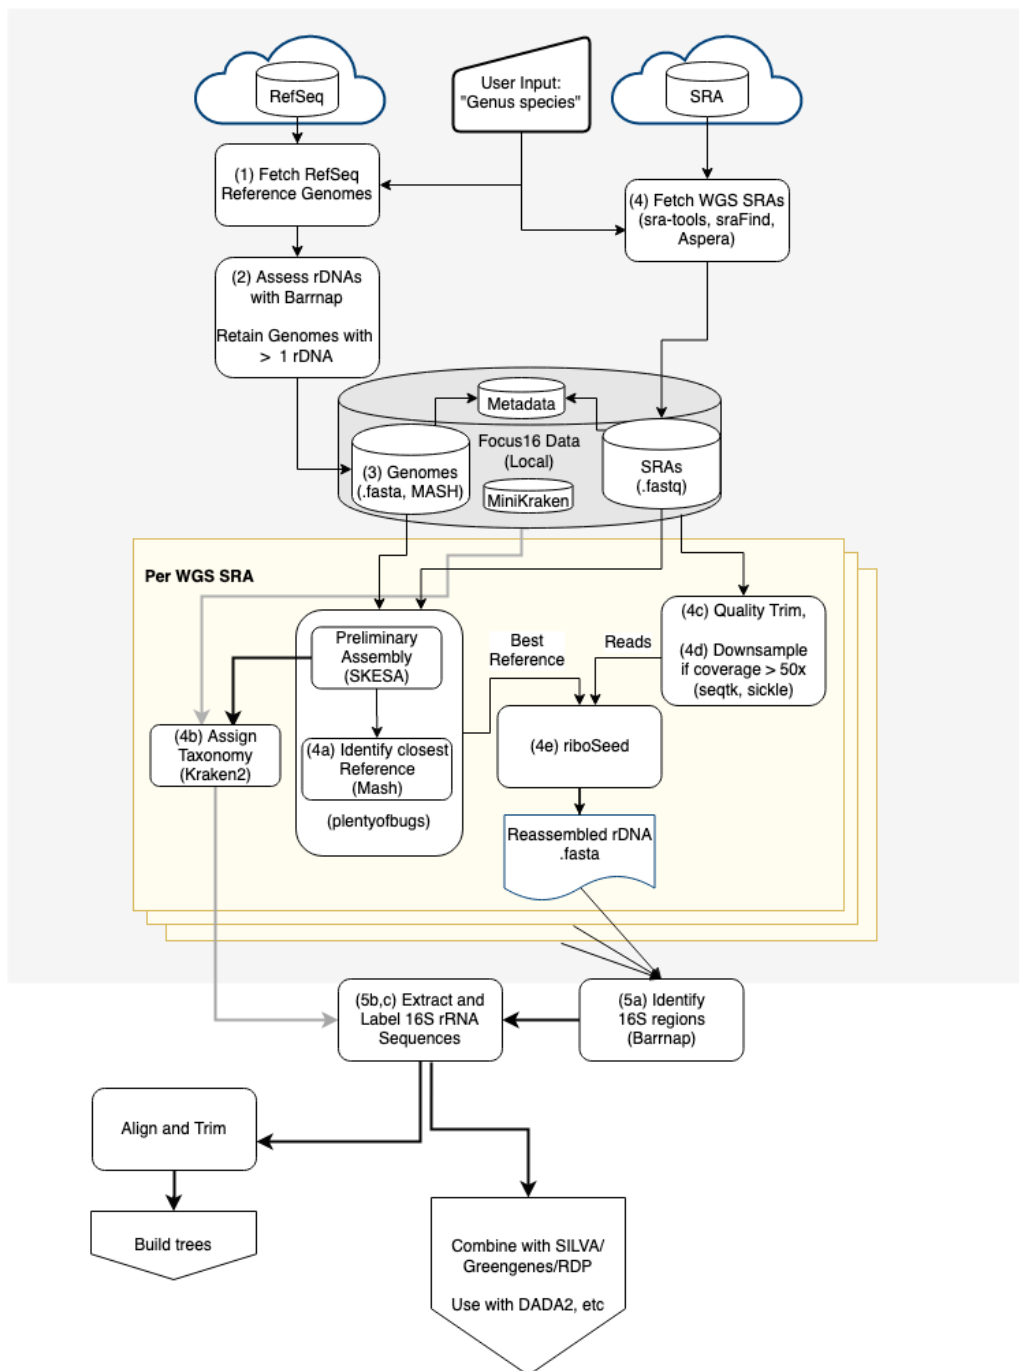

Figure 1: Flowchart of the pipeline that resolves multi-copy 16S loci from sequenced genomes with reads in SRA (as implemented in Focus16). Candidate reference genomes are downloaded from RefSeq. Reads for each SRA are downloaded and Kraken2 is used to assign taxonomy. Corresponding reference genomes and SRA read sets are identified (using SKESA and Mash), and a new assembly constructed from these using riboSeed to resolve 16S rDNAs. The assembled 16S rRNA regions are then taken forward for phylogenetic reconstruction, or to supplement existing reference databases. Numbers refer to stages outlined in the text; gray lines signify to taxonomic information, and black lines signify to sequence information.

## 156 Implementation

157 The Focus16 pipeline can be installed from PyPI or from the source hosted on GitHub at [https://github.com/](https://github.com/FEMLab/focus16)  
 158 FEMLab/focus16; all of the dependencies can be easily managed with Conda for reproducibility. The package  
 159 was designed to efficiently handle the downloading and re-assembly of large amounts of short-read data. Users  
 160 can use SRA-tools's prefetch command for faster downloads of SRA data; the re-assembly status of each SRA is

Table 1: Description of the four datasets considered in this study. The number of strains was readily available for the mock communities; for the Endobiota study, this was determined by a preliminary analysis using DADA2 and SILVA. Asterisk (\*) indicates that this is a calculated number, not a value known beforehand.

| Name      | N Strains | Reference            | Description                                                          |
|-----------|-----------|----------------------|----------------------------------------------------------------------|
| Balanced  | 57        | Schirmer et al. 2015 | Mock community of bacteria and archaea; strains in equal proportions |
| HMP       | 21        | Kozich et al. 2013   | Mock community with common members of the human microbiome           |
| Extremes  | 27        | Callahan et al. 2016 | Mock community of bacteria with greatly varying proportions          |
| Endobiota | 292*      | Ata et al. 2019      | Study comparing microbiomes of women with and without endometriosis  |

161 recorded in an SQLite database. For those with access to a computing cluster running Open Grid Scheduler, the  
162 time-consuming assembly steps can be distributed as array jobs as needed.

163 The first time the pipeline is used, an automated setup procedure is run to download the required databases  
164 for Kraken2 and sraFind.

165 Throughout, diagnostic information is recorded; if an aspect of the pipeline fails, rerunning the same command  
166 will reuse available intermediate results wherever appropriate.

## 167 **Selecting suitable test datasets and identifying genera**

168 Three mock communities described in the DADA2 manuscript (Callahan et al. 2016) were selected to assess the  
169 utility of Focus16. These communities, named “Extremes,” “HMP,” and “Balanced,” and comprising 27, 21, and  
170 57 members respectively (Schirmer et al. 2015; Kozich et al. 2013; Callahan et al. 2016), were sequenced on an  
171 Illumina MiSeq yielding over 500,000 250bp paired-end reads each.

172 To provide an assessment of real-world usage of Focus16, we used the data generated in the EndoBiota study  
173 (Ata et al. 2019)(PRJEB26800): a survey of microbiomes across three body sites of women with and without  
174 endometriosis. These datasets are summarized in Table 1.

175 Unlike the mock communities, the number of genera present in the Endobiota samples is not known *a*  
176 *priori*. We estimated the abundances of community members by processing the samples through DADA2 in  
177 a similar manner to how the Balanced, Extremes, and HMP datasets had been analyzed. The analysis script  
178 `DADA2_analysis.Rmd` can be found in the supplementary materials repository. Processed data was deposited  
179 along with the rest of results generated in this work at <https://zenodo.org/record/1172783>. In short, DADA2  
180 was used to build error profiles for each of the samples in the study. Reads were then trimmed 30bp on the  
181 5’ end and 40bp on the 3’ end, quality trimmed after two low-Q bases, and any residual phi-X sequence was  
182 removed. Merged amplicons were filtered to retain those between 360 and 450 bases. 4.2% of sequences were  
183 determined to be chimeric and removed. Taxonomy was assigned to the remaining 16S rRNA sequences using  
184 DADA2’s `assignTaxonomy` command with the SILVA non-redundant version 132, and species-level taxonomy  
185 was assigned using DADA2’s `addSpecies` command as described in their manual.

186 In total, 333 unique genera were identified across the four datasets; these were cross-referenced with sraFind  
187 and RefSeq, filtering to retain only those with both short-read SRAs available and at least one reference genome  
188 for that genus (Supplementary Figure S2, and Supplementary Table S2). The resulting list of 85 genera was  
189 used as the input for the pipeline.

## 190 Assembly mode parameter choice

191 Candidate 16S rRNA sequences for a given organism could be extracted from riboSeed's subassemblies or the  
192 final *de fere novo* assembly, we sought to determine which was the best choice for generating sequence to extend  
193 the reference databases. Generating the subassembled sequences alone is a less computationally-intensive process  
194 than whole-genome assembly, but the final whole-genome assembly step acts as a further refinement of the  
195 subassemblies. To find which source is the best for augmenting 16S rRNA databases, we determined the error  
196 (SNP/indel) rates by comparing complete genomes to the sequences recovered from either *de novo* re-assembly  
197 of the complete genome, Focus16's "fast" mode (sequences from riboSeed's subassemblies only), and "full" mode  
198 (sequences from riboSeed's final *de fere novo* assembly). The *de novo* assemblies were accurate but failed to  
199 recover many individual 16S rDNAs, as is expected due to the repeated nature of these regions. riboSeed's  
200 subassemblies have low error rates and successfully reconstruct the most 16S rDNAs (Figure 2), and as such are  
201 the ones we report below and recommend for augmenting a database.

### Accuracy of 16S rRNA sequences by assembly method

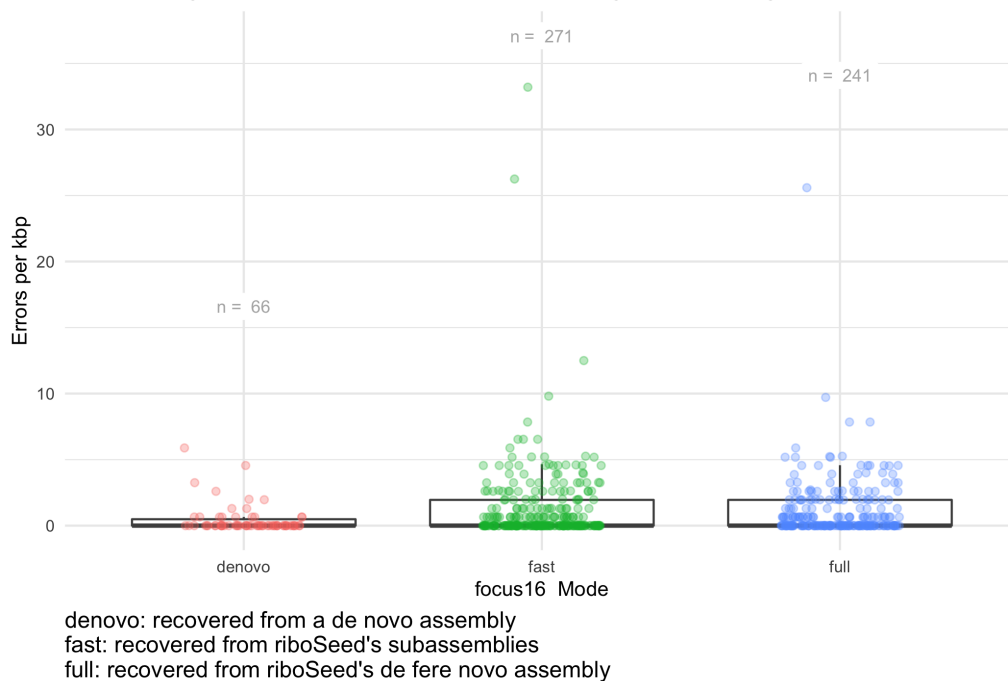

Figure 2: Comparing assembly modes for accuracy. SRAs in our dataset that underwent genome completion were used to identify the most accurate method of 16S rRNA sequence assembly. De novo assembly resulted in highly accurate 16S rRNA sequences, but was only able to recover 66 sequences. 'fast' mode proved to be the best tradeoff between accuracy and efficiency.

## 202 Running Focus16

203 Focus16 was run in a conda environment (see supplementary repository file "Focus16\_env.txt"). Due to  
204 computational limitations (namely storage available on the high-performance computing cluster as well as the  
205 RAM required for genome assembly), we limited the scope of the analysis to a maximum of 50 randomly selected  
206 SRAs for each of the 85 genera. These are listed in the supplementary file `sras.tab` The number of candidate  
207 reference genomes to be considered for each genus was capped at 200; the median number of genomes per genus



208 was 9 (see Figure S3). The only genus with more than 200 reference genomes available was *Bordetella*. A  
209 maximum Mash distance was set to 0.1 (Ondov et al. 2016) between a preliminary assembly and a reference  
210 genome, as this was shown to be the maximum distance between the reference and sequenced isolate that  
211 riboSeed performs well with (see Waters et al. (2018) Figure 5). Run scripts are available in supplementary  
212 data; the reference genomes considered can be found in Supplementary file `reference_genomes.tab`.

## 213 **Benchmarking Re-assembled 16S rRNA against Complete Genome 16S rRNA se-** 214 **quences**

215 sraFind was used to identify which SRA accessions corresponded to complete NCBI genomes for the genera  
216 considered in this study. These were matched with SILVA sequences sourced from complete genomes (see  
217 supplementary data “Provenance of strains”). Pairwise alignments were generated between the riboSeed 16S  
218 rRNA sequences and the SILVA sequences using the Biostrings package (Pagès et al. 2020) in “overlap” mode (a  
219 global alignment with free ends) with a simple scoring matrix (matches=1, mismatches=0); the highest-scoring  
220 alignment for each given reference 16S rRNA was used to identify misassemblies relative to the complete genome’s  
221 16S rRNA sequence. Alignments shorter than 1400bp were rejected.

## 222 **Benchmarking Re-assembled 16S rRNA against Draft 16S rRNA sequences**

223 Similar to the comparison to complete genomes above, we identified the SILVA sequences sourced from draft  
224 genome assemblies (see supplementary data “Provenance of strains”). Pairwise alignments were generated between  
225 the riboSeed 16S rRNA sequences and the SILVA sequences using the Biostrings package (Pagès et al. 2020) in  
226 “overlap” mode (a global alignment with free ends) with a simple scoring matrix (matches=1, mismatches=0);  
227 the highest-scoring alignment for each given reference 16S rRNA was used to identify missassemblies relative to  
228 the complete genome’s 16S rRNA sequence. Alignments shorter than 1400bp were rejected.

## 229 **Assessing Taxonomic Assignment**

230 The DADA2 pipeline was used to process each of the four datasets in Table 1. The resulting sequence tables were  
231 combined, and we assigned taxonomy with the naive Bayes classifier implemented in DADA2. This classified  
232 sequences at the genus level, and DADA2’s “assignSpecies” command was used to assign species-level taxonomy;  
233 we enabled the “allowMultiple” parameter to view ambiguities in the assignment. This analysis was used to  
234 compare assignment with SILVA 132 alone and assignment with SILVA 132 augmented with sequences generated  
235 by Focus16. All scripts can be found in supplementary materials.

## 236 Results

### 237 Benchmarking Re-assembly Accuracy

238 riboSeed has been shown to generate high-quality reconstructions of each rDNA region when benchmarked  
239 against hybrid assemblies (Waters et al. 2018). Using sraFind, we identified which sequences in SILVA originated  
240 from closed, complete genomes; those genome with short-read SRAs were used to benchmark the accuracy of  
241 the 16S rRNA sequences re-assembled with the Focus16 pipeline (as described in Methods section ) against the  
242 sequence in SILVA. In our dataset, 61 of these SRA/complete genome pairs were present.

Accuracy of re-assembled 16S rRNA

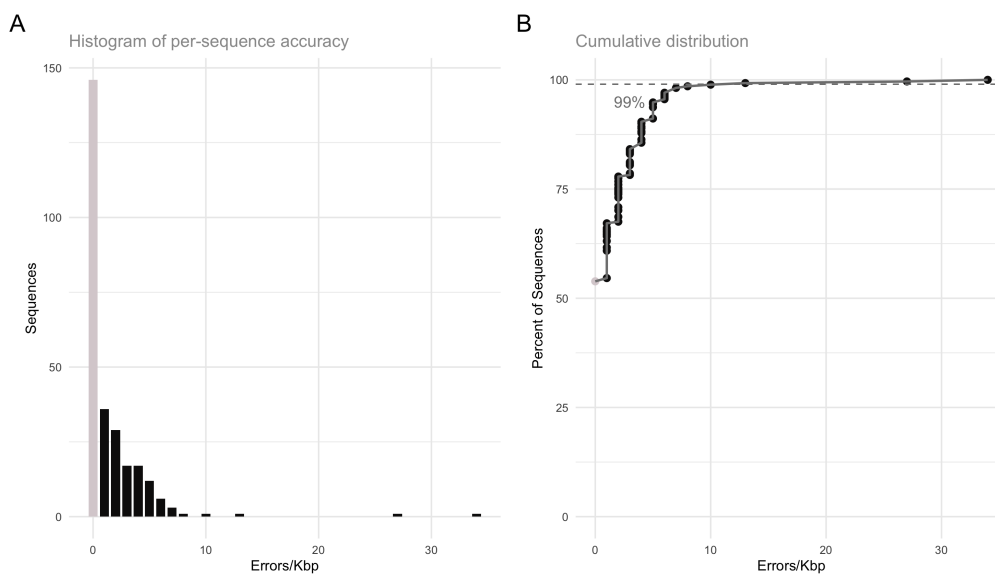

Figure 3: Assembly errors per kilobase calculated between each Focus16 sequence and the reference genome as counts (A) and cumulatively (B). In the genera considered, 285 16S rRNA sequences from 61 complete genomes were present in SILVA; riboSeed recovered 271 of these. 146 of these 16S rRNA alleles were identical between riboSeed and complete genome (grey bars).

243 Comparing the re-assembled 16S rRNA sequences to the 16S rRNA sequences from complete genomes shows  
244 a low error rate, with 53% of sequences being perfect reconstructions and 95% of sequences having fewer than 5  
245 errors per Kbp (Figure 3). This confirms that Focus16's best-case accuracy yields perfect reconstructions of the  
246 rDNA region; those cases for which reconstruction was imperfect rarely have more than 10 errors (an error rate  
247 rarely exceeding 0.7%), and 99% of sequences had fewer than 10 errors per Kbp. This suggests that sequences  
248 could be used to augment existing databases; the benefits and consequences of this are presented in the discussion.  
249 The error rates for amplicon data in SILVA are difficult to determine; under optimal conditions Sanger sequencing  
250 has very low error rates (Shendure and Ji 2008); however when multiple sequences are inadvertently sequenced  
251 at the same time (i.e. multiple copies from a single organism), the trace will reflect the differences as short,  
252 imperfect, or overlapping peaks. As the trace/quality data for amplicon sequences are not typically available, it  
253 is impossible to determine the accuracy of such sequences.

## 254 Comparing re-assembled 16S rRNA to draft 16S rRNA

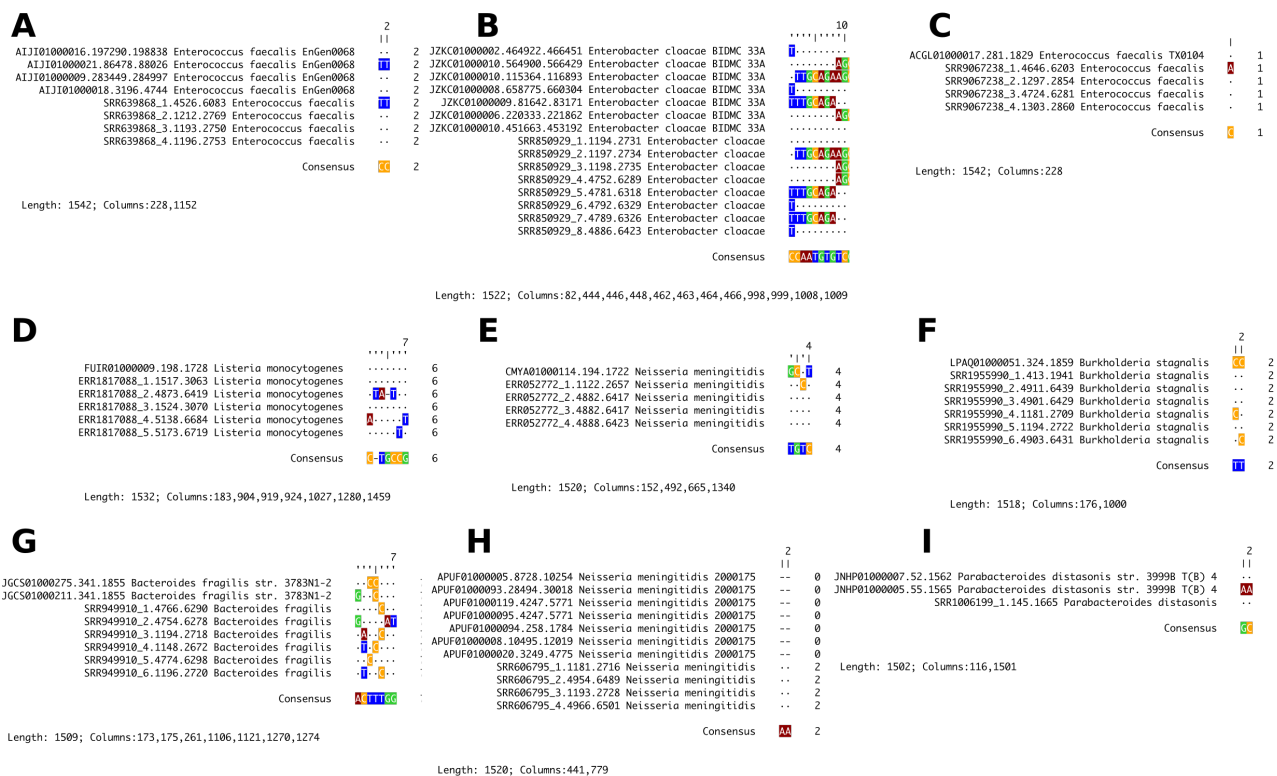

Figure 4: Representative SNP alignments comparing 16S rRNA sequences from original draft assemblies to the re-assembled sequences. Alignments were generated with DECIPHER and all columns matching the consensus were removed; original alignment length and column numbers for each SNP are shown under the sequence names. Names starting with an SRA accession such as ERR and SRR are the re-assembled sequences. The following types of relationships occur: all alleles recovered in original and re-assembled (A,B), sole original sequence misses a single (C) or multiple SNPs (D), disagreement between sole original and re-assembled alleles (E), original sequences appears to be amalgamation of alleles (FG), a deletion is present in original allele (H), re-assembly fails to reconstruct an allele (I).

255 As repeated rDNA operons are difficult to resolve with short read sequences, draft genome assemblies can (and  
 256 often do) contain a single assembled rDNA region with elevated read coverage. This can be problematic for  
 257 genus or 16S rRNA classification as the 16S rRNA recovered may not just correspond to one of several 16S rRNA  
 258 copies, but it can be a consensus “summary”/“collapsed” 16S rRNA resulting from imperfect assembly of the  
 259 repeated region. We provide a few examples of such alignments in Figure 4 (see all alignments in supplementary  
 260 repository folder `figures/draft_alignments/`).

261 In such cases, without the capacity to verify the regions with Sanger or long-read sequencing, determining  
 262 which sequences are the missassemblies and which should be regarded as true is an impossible task.

## 263 Augmenting SILVA with results from Focus16

### 264 Recovering Sequences from Re-assembly

265 Focus16 was used to build an extended database for the three mock datasets described in the DADA2 paper  
 266 and a real-world dataset from the Endobiota study. From the 85 genera considered, Focus16 processed 2387

267 SRAs, and recovered 16S rRNA sequences from 1392 SRAs. The average execution time for a given SRA was  
268 approximately 23 minutes. Several factors can contribute to failing to recover 16S rRNA sequences from a given  
269 SRA, and among these are a too-distant reference genome, low rDNA flanking diversity, low read length, or high  
270 read error rates. In total, we recovered 5854 16S rRNA sequences, of which 3008 were unique.

### 271 **Recovery of unique sequences**

272 Ideally, Focus16 would be applied to every eligible SRA currently available, and periodically rerun as more  
273 high-quality reference genomes are generated with long-read technologies; in this pilot study, we assessed the  
274 increase in unique sequences gained by augmenting SILVA with only the 85 genera found across these four  
275 datasets. For thoroughly-sequenced genera such as *Escherichia*, *Pseudomonas*, or *Bacillus*, the increases in  
276 unique sequences are small. However, other taxa showed marked increases in the genus-level 16S rRNA sequence  
277 diversity (Figure 5).

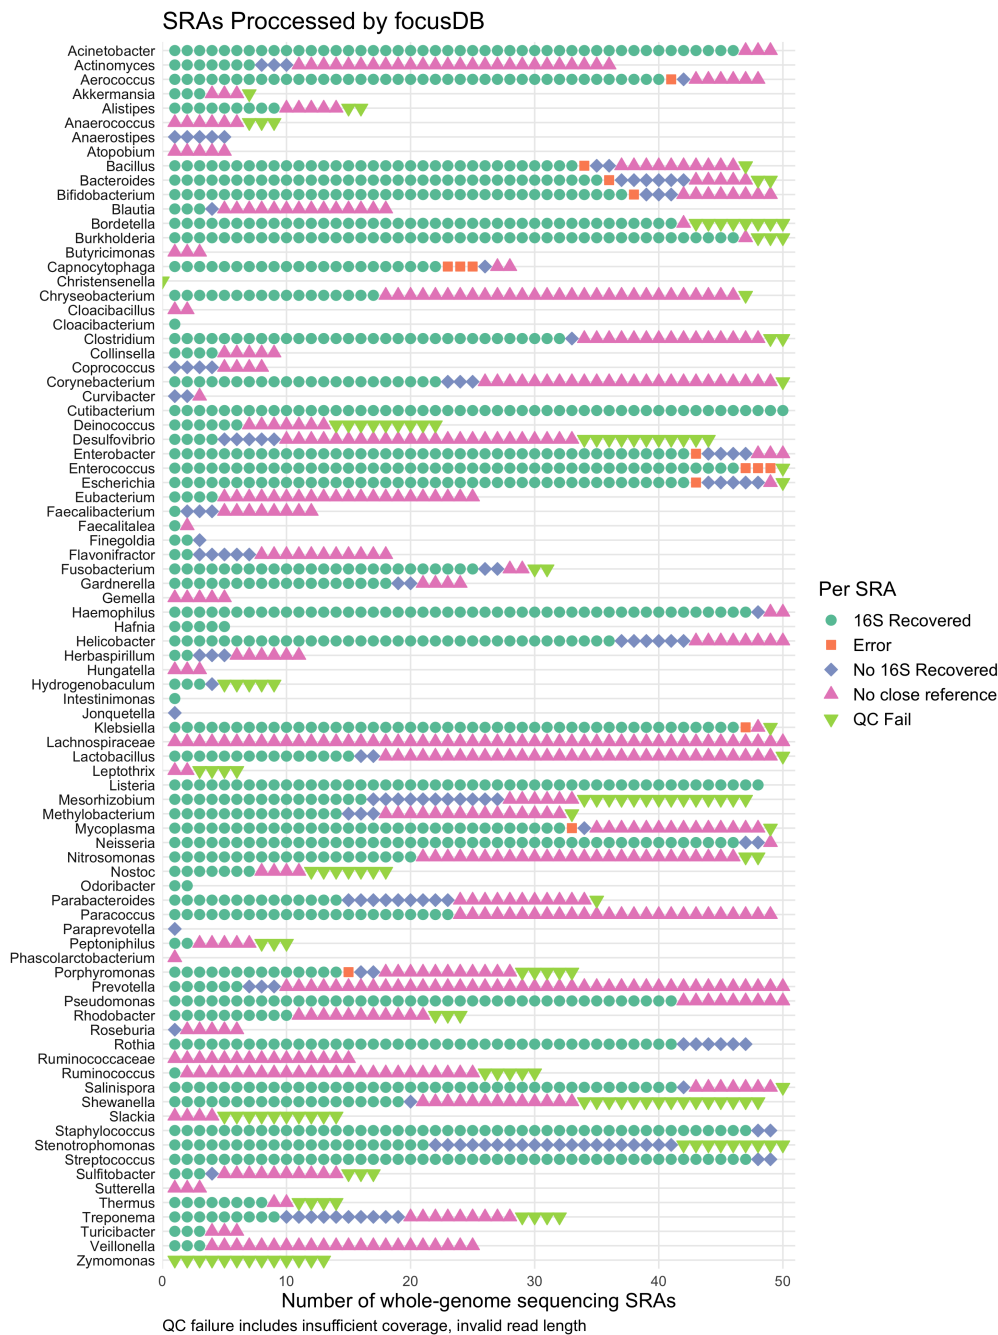

Figure 5: Summary of Focus16 outcomes for reassembling SRA datasets. Green circles indicate SRAs that yielded 16S rRNA sequences, while blue diamonds indicate SRAs failing to yield re-assembled 16S rRNA sequences. Pink triangles show SRAs that were rejected due to limitations in the diversity of available reference genomes, and inverted green triangles show SRAs rejected due to read length, insufficient coverage, poor read quality, etc. A few errors occurred, usually when the SRAs metadata conflicted with the associated sequencing data and caused download errors or errors from reads with incorrect pairing. In these cases, the datasets were discarded.

## 278 Assessing Taxonomic Assignment

279 DADA2 was used to identify ASVs from four datasets (Table 1), resulting in a total of 4098 ASVs (109 sequences  
 280 from the “HMP” dataset, 26 from the “Extreme” dataset, 94 from the “balanced” dataset, and the rest from  
 281 the EndoBiota study). We then compared the taxonomic results of classification using the SILVA 132 database  
 282 either as-is, or augmented with novel 16S identified with Focus16.

283 Of the 4098 sequences, Focus16 changed the taxonomic assignment of 20 strains (see Table 2, or Supplementary

284 file STABLE\_different\_assignment.tab for the actual sequences). Changes could happen in three ways: a  
 285 previously unclassified ASV gained classification, a previously-assigned ASV gained more species- (or genus-)  
 286 level details, or a previously-classified ASV was given a different classification. In our dataset, three unclassified  
 287 strains gained annotations (Table 2 rows 5, 10, and 11) . The remaining 17 had more detail added to the genus  
 288 or species level; usually, this meant that with SILVA alone a single species classification was given, but with the  
 289 augmented database, it was indicated that the ASV was ambiguous and could belong to more than one species  
 290 (Table 2 rows 4,6,8,9,12,13,14 ) or genus (Table 2 rows 1,2,7, 15-20) level. No previously-assigned ASVs were  
 291 assigned a completely different annotation.

292 If this pilot study is perfectly representative, users could expect an improved taxonomic assignment for about  
 293 0.5% of ASVs; two factors must be considered before extrapolating that value beyond this study. First, we were  
 294 limited in the number of SRAs per genus that could be processed (Supplementary Figure 1 shows the number of  
 295 SRAs per genus). Second, and perhaps more importantly, the majority of genera in this study are associated  
 296 with human microbiomes, an area which has already seen an extensive amount of focus in terms of amplicon  
 297 sequencing, whole-genome sequencing, and genome completion efforts. Other environments have not had this  
 298 benefit, and perhaps have more room for improvement.

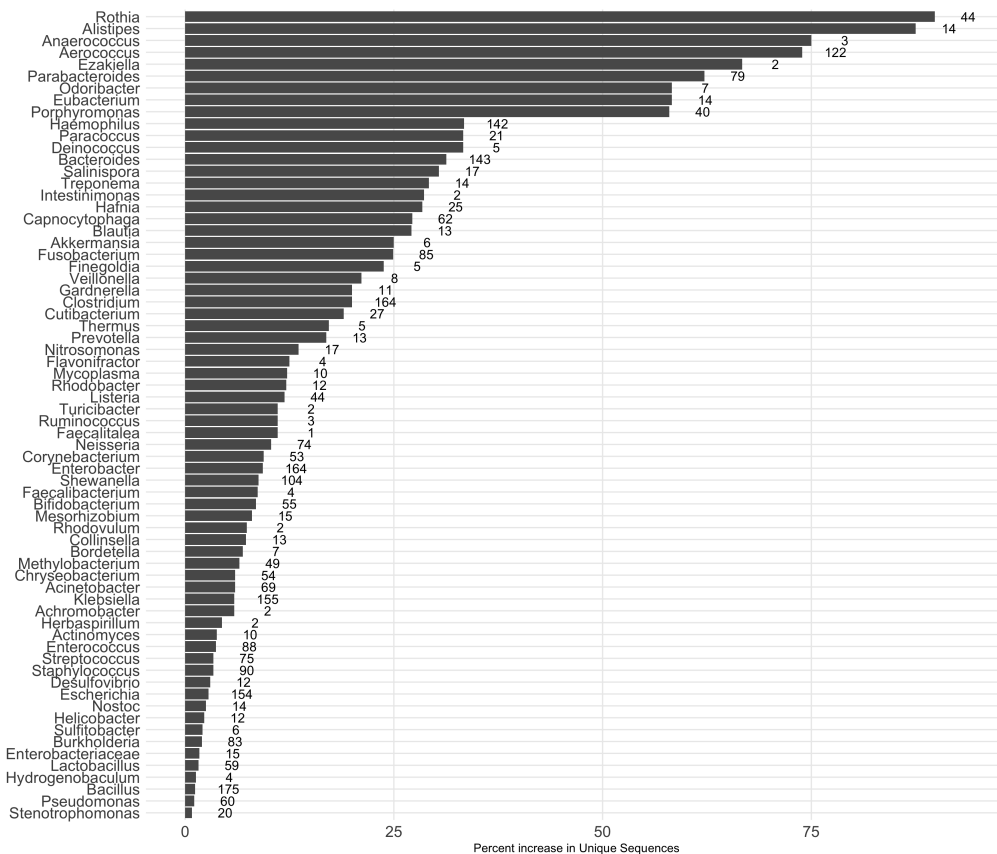

Figure 6: Percentage increase in unique sequences (and number of added unique sequences), by genus. The addition of the sequences recovered by Focus16 increases the number of unique sequences for the given taxa; the greatest increases are found in "under-sequenced" taxa and/or taxa with less well-conserved rRNA sequences.

Table 2: Of the 4098 ASVs aggregated across the four datasets considered, the augmented database modified taxonomic assignment of 20 sequences. Cells reading 'NA NA' indicate that no genus or species could be assigned. Cells reading NA speciesA/speciesB indicate that the lowest common ancestor for a sequence could not be determined at the genus level; in such cases DADA2 gives the designation NA rather than listing possible genera as is done at species level.

|    | SILVA                                                                                                 | SILVA + Focus16                                                                                                    |
|----|-------------------------------------------------------------------------------------------------------|--------------------------------------------------------------------------------------------------------------------|
| 1  | Peptoniphilus asaccharolyticus/ grossensis/ harei                                                     | NA asaccharolyticus/ grossensis/ harei/ massiliensis                                                               |
| 2  | Peptoniphilus harei                                                                                   | NA harei/ mediterraneensis                                                                                         |
| 3  | NA asburiae/ cancerogenus/ cloacae/ hormaechei/ ludwigii/ pneumoniae/ quasipneumoniae/ xiangfangensis | NA asburiae/ bugandensis/ cancerogenus/ cloacae/ hormaechei/ ludwigii/ pneumoniae/ quasipneumoniae/ xiangfangensis |
| 4  | Enterobacter asburiae/ cloacae/ hormaechei/ ludwigii/ mori/ soli/ tabaci/ xiangfangensis              | Enterobacter asburiae/ bugandensis/ cloacae/ hormaechei/ ludwigii/ mori/ soli/ tabaci/ xiangfangensis              |
| 5  | NA NA                                                                                                 | Rothia mucilaginoso                                                                                                |
| 6  | Blautia massiliensis                                                                                  | Blautia hansenii/ massiliensis                                                                                     |
| 7  | Phascolarctobacterium faecium                                                                         | NA faecium/ fermentans                                                                                             |
| 8  | Veillonella dispar                                                                                    | Veillonella dispar/ parvula                                                                                        |
| 9  | Gemella haemolysans/ sanguinis/ taiwanensis                                                           | Gemella haemolysans/ morbillorum/ sanguinis/ taiwanensis                                                           |
| 10 | NA NA                                                                                                 | Haemophilus parainfluenzae                                                                                         |
| 11 | NA NA                                                                                                 | Haemophilus parainfluenzae                                                                                         |
| 12 | Bacteroides uniformis                                                                                 | Bacteroides helcogenes/ uniformis                                                                                  |
| 13 | Alistipes massiliensis                                                                                | Alistipes massiliensis/ shahii                                                                                     |
| 14 | Alistipes obesi                                                                                       | Alistipes finegoldii/ obesi/ shahii                                                                                |
| 15 | Cloacibacterium normanense                                                                            | NA normanense/ taklimakanense                                                                                      |
| 16 | Phascolarctobacterium faecium                                                                         | NA faecium/ fermentans                                                                                             |
| 17 | Listeria innocua/ ivanovii/ marthii/ monocytogenes/ phage/ seeligeri/ welshimeri                      | NA epidermidis/ innocua/ ivanovii/ marthii/ monocytogenes/ phage/ seeligeri/ welshimeri                            |
| 18 | Listeria innocua/ ivanovii/ marthii/ monocytogenes/ phage/ seeligeri/ welshimeri                      | NA epidermidis/ innocua/ ivanovii/ marthii/ monocytogenes/ phage/ seeligeri/ welshimeri                            |
| 19 | Rhodobacter johrii/ megalophilus/ ovatus/ sphaeroides                                                 | NA johrii/ megalophilus/ ovatus/ sphaeroides/ sulfidophilum                                                        |
| 20 | Rhodobacter johrii/ megalophilus/ ovatus/ sphaeroides                                                 | NA johrii/ megalophilus/ ovatus/ sphaeroides/ sulfidophilum                                                        |

## 299 Discussion

300 Focus16 orchestrates the re-assembly of whole-genome sequencing datasets in SRA to recover 16S rRNA sequences  
301 that may be missing from the existing reference databases. Using riboSeed, Focus16 re-assembles draft genomes  
302 that currently contribute a single (often collapsed) 16S rRNA to resolve distinct instances of the 16S rRNA  
303 operon. We show that this increases the sequence diversity (number of unique sequences) of the 16S rRNA  
304 databases, and that the increased diversity results in measurable improvements to taxonomic assignment.

305 Focus16 improved fine-scale taxonomic assignment in two ways: by assigning previously unclassified sequences,  
306 and by revealing “overeager” species assignment when a 16S rDNA sequence could have come from two or more  
307 species. While at face value this appears to reduce the precision of taxonomic assignment, it reveals cases where  
308 species-level assignment was inappropriate. Based on the improved taxonomic assignment in this pilot study of  
309 85 genera, we believe a wide-scale application of Focus16 could benefit the community.

310 A natural concern about the approach presented here is the danger of “poisoning” the database with sequences  
311 that may or may not be 100% accurate. This is valid concern, but one we believe to be outweighed by the  
312 potential of offsetting the known problems with existing 16S rRNA databases. Those 16S rRNA sequences in  
313 SILVA originating from amplicons lack the taxonomic confidence that comes with whole-genome sequencing.  
314 Sequences from draft whole-genome assemblies have known issues with rDNA missassembly; in the best case,  
315 only one accurate 16S rRNA is represented; in the worst case, the one assembled 16S rRNA sequence may  
316 be an amalgamation of the different copies. Until long-read sequencing efforts sufficiently explore the same  
317 microbial genomic diversity currently covered by current 16S rRNA databases, these issues must be considered  
318 when attempting community analysis via 16S rRNA sequencing. A conservative approach to utilizing sequences  
319 recovered with the methodology presented here may be to incorporate a measure of taxonomic assignment  
320 confidence, where reference sequences originating from long reads, amplicons, draft assemblies, and focus16  
321 reassemblies could be weighted appropriately.

322 However, there are three main limitations facing the large-scale application of Focus16: the first is the  
323 bandwidth, computational power, memory, and storage required to re-assemble the 98,329 SRAs (as of October  
324 2019) that were used to generate draft genomes. Given sufficient storage and unfettered access to a medium/large  
325 computing cluster such as one supporting a university or research institute (say 150 compute nodes), the task  
326 could be completed within two weeks<sup>1</sup>, and the task could be accomplished in even less time with a sufficiently  
327 large cloud computing budget; however with modest hardware (8 cores, 20GB RAM), this would take about 4  
328 years in “-fast” mode. These estimates are ignoring the 112,695 draft genomes for which no reads were ever  
329 released, which leads to the second limitation: data availability. Releasing draft genomes without the reads used  
330 to generate them hampers efforts such as this one to expand beyond the purpose of the original study.

331 The third limitation of this approach is the availability of high-quality closed genomes to use as references.  
332 With the increased adoption of long read technologies, we envisage that this limitation will decrease with time;  
333 re-running the pipeline as new, complete reference genomes are generated will allow for ongoing improvements

---

<sup>1</sup>This estimation is based on an rough average processing time of 23 minutes per run, but this is highly dependent on download speed, read/write speed, genome size, and sequencing depth.



334 to the databases. Eventually, a point will come when Focus16 will no longer be needed as all candidate SRAs  
335 have been sufficiently utilized.

336 Further limitations exist within Focus16 and within riboSeed. The success of riboSeed's *de fere novo* assembly  
337 hinges on the similarity of the reference to the sequenced isolate, the differentiating power of the rDNA flanking  
338 regions, read length, and other factors. This is one reason why not all SRAs yielded perfect rDNAs. Additionally,  
339 riboSeed does not currently support mate-paired libraries; these are much less widely used than the typical  
340 single-end or paired-end libraries used in short-read sequencing.

341 Despite these limitations, we have shown that Focus16 can contribute towards better molecular ecology  
342 analysis; augmenting SILVA with the sequences re-assembled from the 85 genera considered here led to a small  
343 increase in the number of unique sequences in the database. Using the augmented database for taxonomic  
344 assignment revealed some limitations of low-level taxonomic assignment, and led to the classification of additional  
345 ASVs. We invite the community to consider augmenting existing databases (such as NCBI's 16S RefSeq Microbial  
346 database, SILVA, RDP, and GreenGenes) with the approach outlined here.

## 347 **Competing interests**

348 The authors declare that they have no competing interests.

## 349 **Funding**

350 This work was financially supported by Science Foundation Ireland (Awards 14/IA/2371 and 16/RC/3889) and  
351 through a joint studentship between The James Hutton Institute and the National University of Ireland, Galway.

## 352 **Acknowledgements**

353 Many thanks to Christopher Quince for the helpful conversations on the topic.

## 354 **Data Accessibility**

355 The code for Focus16 can be found at <https://github.com/FEMLab/focus16>; the code for all the analyses  
356 presented in this work can be found at [https://github.com/FEMLab/focus16\\_manuscript](https://github.com/FEMLab/focus16_manuscript). All data used is  
357 archived at Zenodo accession 10.5281/zenodo.3956433.

## 358 **Author Contributions**

359 Author contributions according to the CRediT taxonomy (Allen, O'Connell, and Kiermer 2019) are listed  
360 alphabetically as follows: Conceptualization: LP, NW ; Methodology: FA, BN, LP, NW; Software and Data  
361 Curation: BN, NW; Validation: BN, LP, NW; Formal analysis: BN, LP, NW; Investigation: BN, NW; Resources;

362 FA, VOF, LP; Writing - Original Draft: BN, NW; Writing - Review & Editing: FA, FB, VOF, AH, BN, LP,  
363 NW; Visualization: BN, LP, NW; Supervision: FA, FB, VOF, AH, LP, NW; Project administration FA, VOF,  
364 NW; Funding acquisition: FA, FB, VOF, LP, NW.

## 365 References

- 366 Acinas, Silvia G, Luisa A Marcelino, Vanja Klepac-Ceraj, and Martin F Polz. 2004. "Divergence and Redundancy  
367 of 16s rRNA Sequences in Genomes with Multiple Rrn Operons." *Journal of Bacteriology* 186 (9): 2629–35.
- 368 Allen, Liz, Alison O'Connell, and Veronique Kiermer. 2019. "How Can We Ensure Visibility and Diversity  
369 in Research Contributions? How the Contributor Role Taxonomy (CRediT) Is Helping the Shift from  
370 Authorship to Contributorship." *Learned Publishing* 32 (1): 71–74. <https://doi.org/10.1002/leap.1210>.
- 371 Ata, Baris, Sule Yildiz, Engin Turkgeldi, Vicente Pérez Brocal, Ener Cagri Dinleyici, Andrés Moya, and  
372 Bulent Urman. 2019. "The Endobiota Study: Comparison of Vaginal, Cervical and Gut Microbiota  
373 Between Women with Stage 3/4 Endometriosis and Healthy Controls." *Scientific Reports* 9 (1): 1–9.  
374 <https://doi.org/10.1038/s41598-019-39700-6>.
- 375 Avila-Jaime, B, JR Kawas, and JF Garcia-Mazcorro. 2018. "Prediction of Functional Metagenomic Composition  
376 Using Archived 16s rDNA Sequence Data from the Gut Microbiota of Livestock." *Livestock Science* 213:  
377 28–34.
- 378 Bankevich, Anton, Sergey Nurk, Dmitry Antipov, Alexey A Gurevich, Mikhail Dvorkin, Alexander S Kulikov,  
379 Valery M Lesin, et al. 2012. "SPAdes: A New Genome Assembly Algorithm and Its Applications to Single-Cell  
380 Sequencing." *Journal of Computational Biology* 19 (5): 455–77. <https://doi.org/10.1089/cmb.2012.0021>.
- 381 Boers, Stefan A., Ruud Jansen, and John P. Hays. 2019. "Understanding and Overcoming the Pitfalls and  
382 Biases of Next-Generation Sequencing (NGS) Methods for Use in the Routine Clinical Microbiological  
383 Diagnostic Laboratory." *European Journal of Clinical Microbiology & Infectious Diseases* 38 (6): 1059–70.  
384 <https://doi.org/10.1007/s10096-019-03520-3>.
- 385 Callahan, Benjamin J., Paul J. McMurdie, Michael J. Rosen, Andrew W. Han, Amy Jo A. Johnson, and Susan P.  
386 Holmes. 2016. "Dada2: High-Resolution Sample Inference from Illumina Amplicon Data." *Nature Methods*  
387 13 (7): 581–83. <https://doi.org/10.1038/nmeth.3869>.
- 388 Chen, Shifu, Yanqing Zhou, Yaru Chen, and Jia Gu. 2018. "Fastp: An Ultra-Fast All-in-One FASTQ  
389 Preprocessor." *Bioinformatics* 34 (17): i884–90. <https://doi.org/10.1093/bioinformatics/bty560>.
- 390 Cole, James R, Benli Chai, Ryan J Farris, Qiong Wang, SA Kulam, Donna M McGarrell, George M Garrity, and  
391 James M Tiedje. 2005. "The Ribosomal Database Project (RDP-II): Sequences and Tools for High-Throughput  
392 rRNA Analysis." *Nucleic Acids Research* 33 (suppl\_1): D294–96.
- 393 Dang, Hongyue, and Charles R Lovell. 2000. "Bacterial Primary Colonization and Early Succession on Surfaces  
394 in Marine Waters as Determined by Amplified rRNA Gene Restriction Analysis and Sequence Analysis of  
395 16s rRNA Genes." *Appl. Environ. Microbiol.* 66 (2): 467–75.

- 396 DeSantis, Todd Z, Philip Hugenholtz, Neils Larsen, Mark Rojas, Eoin L Brodie, Keith Keller, Thomas Huber,  
397 Daniel Dalevi, Ping Hu, and Gary L Andersen. 2006. "Greengenes, a Chimera-Checked 16s rRNA Gene  
398 Database and Workbench Compatible with ARB." *Appl. Environ. Microbiol.* 72 (7): 5069–72.
- 399 Edgar, Robert C. 2018. "Updating the 97% Identity Threshold for 16s Ribosomal RNA OTUs." *Bioinformatics*  
400 34 (14): 2371–75. <https://doi.org/10.1093/bioinformatics/bty113>.
- 401 Fukuda, Kazumasa, Midori Ogawa, Hatsumi Taniguchi, and Mitsumasa Saito. 2016. "Molecular Approaches  
402 to Studying Microbial Communities: Targeting the 16s Ribosomal RNA Gene." *Journal of UOEH* 38 (3):  
403 223–32.
- 404 Joshi, NA, and JN Fass. 2011. "Sickle: A Sliding-Window, Adaptive, Quality-Based Trimming Tool for FastQ  
405 Files (Version 1.33)."
- 406 Jovel, Juan, Jordan Patterson, Weiwei Wang, Naomi Hotte, Sandra O'Keefe, Troy Mitchel, Troy Perry, et  
407 al. 2016. "Characterization of the Gut Microbiome Using 16s or Shotgun Metagenomics." *Frontiers in*  
408 *Microbiology* 7 (April). <https://doi.org/10.3389/fmicb.2016.00459>.
- 409 Kodama, Yuichi, Martin Shumway, and Rasko Leinonen. 2011. "The Sequence Read Archive: Explosive Growth  
410 of Sequencing Data." *Nucleic Acids Research* 40 (D1): D54–56.
- 411 Kozich, James J., Sarah L. Westcott, Nielson T. Baxter, Sarah K. Highlander, and Patrick D. Schloss. 2013.  
412 "Development of a Dual-Index Sequencing Strategy and Curation Pipeline for Analyzing Amplicon Sequence  
413 Data on the MiSeq Illumina Sequencing Platform." *Applied and Environmental Microbiology* 79 (17): 5112–20.  
414 <https://doi.org/10.1128/AEM.01043-13>.
- 415 Land, Miriam, Loren Hauser, Se-Ran Jun, Intawat Nookaew, Michael R Leuze, Tae-Hyuk Ahn, Tatiana Karpinets,  
416 et al. 2015. "Insights from 20 Years of Bacterial Genome Sequencing." *Functional & Integrative Genomics* 15  
417 (2): 141–61.
- 418 Li, Heng. 2020. "Seqtk." <https://github.com/lh3/seqtk>.
- 419 Liu, Weilong, Lv Li, Md Asaduzzaman Khan, and Feizhou Zhu. 2012. "Popular Molecular Markers in Bacteria."  
420 *Molecular Genetics, Microbiology and Virology* 27 (3): 103–7.
- 421 Ondov, Brian D., Todd J. Treangen, Páll Melsted, Adam B. Mallonee, Nicholas H. Bergman, Sergey Koren,  
422 Adam M. Phillippy, et al. 2016. "Mash: Fast Genome and Metagenome Distance Estimation Using MinHash."  
423 *Genome Biology* 17 (1): 132. <https://doi.org/10.1186/s13059-016-0997-x>.
- 424 Pagès, H., P. Aboyoun, R. Gentleman, and S. DebRoy. 2020. "Biostrings: Efficient Manipulation of Biological  
425 Strings." Bioconductor version: Release (3.10). <https://doi.org/10.18129/B9.bioc.Biostrings>.
- 426 Quast, Christian, Elmar Pruesse, Pelin Yilmaz, Jan Gerken, Timmy Schweer, Pablo Yarza, Jörg Peplies, and  
427 Frank Oliver Glöckner. 2012. "The SILVA Ribosomal RNA Gene Database Project: Improved Data Processing  
428 and Web-Based Tools." *Nucleic Acids Research* 41 (D1): D590–96.
- 429 Santamaria, Johanna, Carmen Alicia Parrado, and Liliana López. 2018. "Soil Microbial Community Structure  
430 and Diversity in Cut Flower Cultures Under Conventional and Ecological Management." *Revista Brasileira*  
431 *de Ciência Do Solo* 42.

- 432 Schirmer, Melanie, Umer Z. Ijaz, Rosalinda D'Amore, Neil Hall, William T. Sloan, and Christopher Quince.  
433 2015. "Insight into Biases and Sequencing Errors for Amplicon Sequencing with the Illumina MiSeq Platform."  
434 *Nucleic Acids Research* 43 (6): e37–37. <https://doi.org/10.1093/nar/gku1341>.
- 435 Seemann, Torsten. 2020. "Barrnap: Bacterial Ribosomal RNA Predictor."
- 436 Shendure, Jay, and Hanlee Ji. 2008. "Next-Generation DNA Sequencing." *Nature Biotechnology* 26 (10): 1135–45.  
437 <https://doi.org/10.1038/nbt1486>.
- 438 Souvorov, Alexandre, Richa Agarwala, and David J. Lipman. 2018. "SKESA: Strategic k-Mer Extension for  
439 Scrupulous Assemblies." *Genome Biology* 19 (1): 153. <https://doi.org/10.1186/s13059-018-1540-z>.
- 440 "Sra-Tools." 2019. NCBI - National Center for Biotechnology Information/NLM/NIH. [https://github.com/  
441 ncbi/sra-tools](https://github.com/ncbi/sra-tools).
- 442 Stoddard, Steven F., Byron J. Smith, Robert Hein, Benjamin R. K. Roller, and Thomas M. Schmidt. 2015.  
443 "rrnDB: Improved Tools for Interpreting rRNA Gene Abundance in Bacteria and Archaea and a New  
444 Foundation for Future Development." *Nucleic Acids Research* 43 (Database issue): D593–598. <https://doi.org/10.1093/nar/gku1201>.
- 445
- 446 Sun, Dong-Lei, Xuan Jiang, Qinglong L Wu, and Ning-Yi Zhou. 2013. "Intragenomic Heterogeneity of 16s rRNA  
447 Genes Causes Overestimation of Prokaryotic Diversity." *Appl. Environ. Microbiol.* 79 (19): 5962–69.
- 448 Větrovský, Tomáš, and Petr Baldrian. 2013. "The Variability of the 16S rRNA Gene in Bacterial Genomes  
449 and Its Consequences for Bacterial Community Analyses." *PLoS ONE* 8 (2). [https://doi.org/10.1371/  
450 journal.pone.0057923](https://doi.org/10.1371/journal.pone.0057923).
- 451 Wagner, Josef, Paul Coupland, Hilary P. Browne, Trevor D. Lawley, Suzanna C. Francis, and Julian Parkhill.  
452 2016. "Evaluation of PacBio Sequencing for Full-Length Bacterial 16S rRNA Gene Classification." *BMC  
453 Microbiology* 16 (1): 274. <https://doi.org/10.1186/s12866-016-0891-4>.
- 454 Wang, Qiong, George M Garrity, James M Tiedje, and James R Cole. 2007. "Naive Bayesian Classifier for Rapid  
455 Assignment of rRNA Sequences into the New Bacterial Taxonomy." *Appl. Environ. Microbiol.* 73 (16):  
456 5261–67.
- 457 Waters, Nicholas. 2019. "Plentyofbugs." Zenodo. <https://doi.org/10.5281/zenodo.3457383>.
- 458 Waters, Nicholas, Florence Abram, Fiona Brennan, Ashleigh Holmes, and Leighton Pritchard. 2018. "riboSeed:  
459 Leveraging Prokaryotic Genomic Architecture to Assemble Across Ribosomal Regions." *Nucleic Acids  
460 Research* 46 (11): e68–68.
- 461 Woese, C R, and G E Fox. 1977. "Phylogenetic Structure of the Prokaryotic Domain: The Primary Kingdoms."  
462 *Proceedings of the National Academy of Sciences of the United States of America* 74 (11): 5088–90.
- 463 Woo, PCY, SKP Lau, JLL Teng, H Tse, and K-Y Yuen. 2008. "Then and Now: Use of 16s rDNA Gene  
464 Sequencing for Bacterial Identification and Discovery of Novel Bacteria in Clinical Microbiology Laboratories."  
465 *Clinical Microbiology and Infection* 14 (10): 908–34.
- 466 Wood, Derrick E., Jennifer Lu, and Ben Langmead. 2019. "Improved Metagenomic Analysis with Kraken 2."  
467 *Genome Biology* 20 (1): 257. <https://doi.org/10.1186/s13059-019-1891-0>.
